# Supplementary material
Source: PubMed Central journal article supplement (PMC2518632)
Supplement: NIHMS62501-supplement-si20070424_091.pdf [file NIHMS62501-supplement-si20070424_091.pdf]

# Ruthenium Complexes that Break the Rules: Structural Features Controlling

## Dual Emission

Edith C. Glazer, Douglas Magde, and Yitzhak Tor\*

Department of Chemistry and Biochemistry, University of California, San Diego,

La Jolla, CA 92093-0358

email: [ytor@chem.ucsd.edu](mailto:ytor@chem.ucsd.edu)

### Supporting Information

Synthesis

Steady-State UV/vis and Fluorescence Studies

**Figure S1.** UV/Vis and fluorescence spectra of **11** with and without Zn<sup>II</sup>.

**Figure S2.** Emission of compounds **8**, **9** and **10**.

## Synthesis

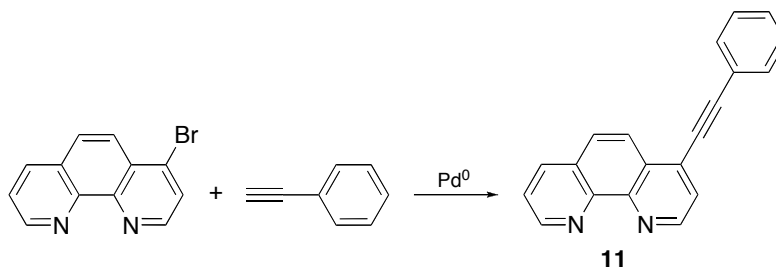

**Compound 11.** **11** was obtained from 4-bromo-1, 10-phenanthroline in the same manner as the metal complexes. The compound was purified via flash chromatography (silica gel, 5% MeOH/CH<sub>2</sub>Cl<sub>2</sub>) to give the product in 65% yield. <sup>1</sup>H NMR (CDCl<sub>3</sub>) δ 9.14 (dd, *J*=3.9, 1.5 Hz), 1H), 9.10 (d, *J*=4.8 Hz, 1H), 8.27 (d, *J*=8.8 Hz, 1H), 8.16 (dd, *J*=8.1, 0.5 Hz, 1H), 7.77 (d, *J*=9.2 Hz, 1H), 7.70 (d, *J*=5.6 Hz, 1H), 7.64-7.62 (m, 2H), 7.58-7.55 (m, 1H), 7.39-7.38 (m, 3H). <sup>13</sup>C NMR (CDCl<sub>3</sub>) δ 150.65, 149.78, 146.34, 136.23, 132.17, 130.03, 129.69, 128.84, 128.42, 127.27, 125.50, 124.57, 123.49, 122.28, 99.23, 85.31. ESI-MS calcd for C<sub>20</sub>H<sub>12</sub>N<sub>2</sub> [MH]<sup>+</sup> 281.3, found MH<sup>+</sup> 281.5.

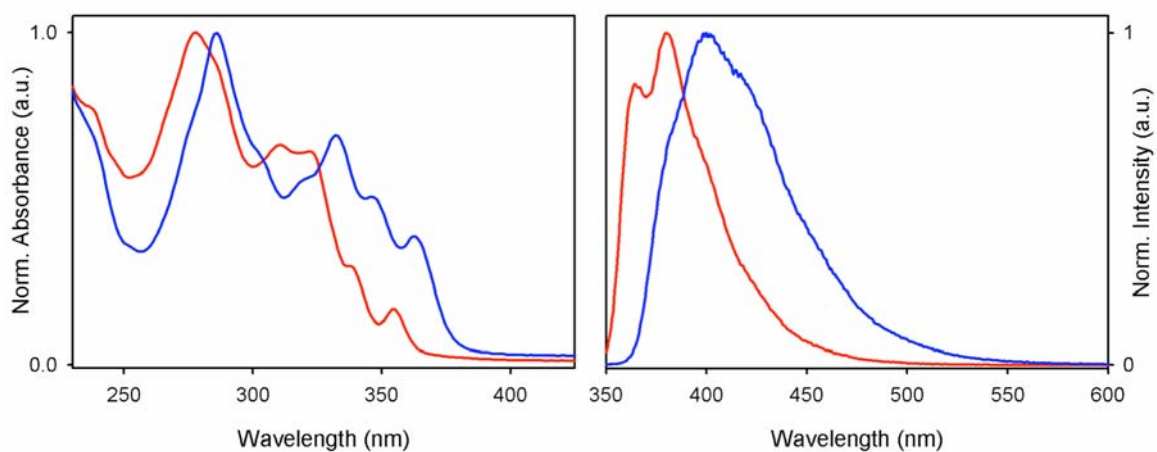

**Figure S1.** UV/Vis (left) and emission (right) of **11** in the absence (red) and presence (blue) of excess Zn<sup>II</sup>.

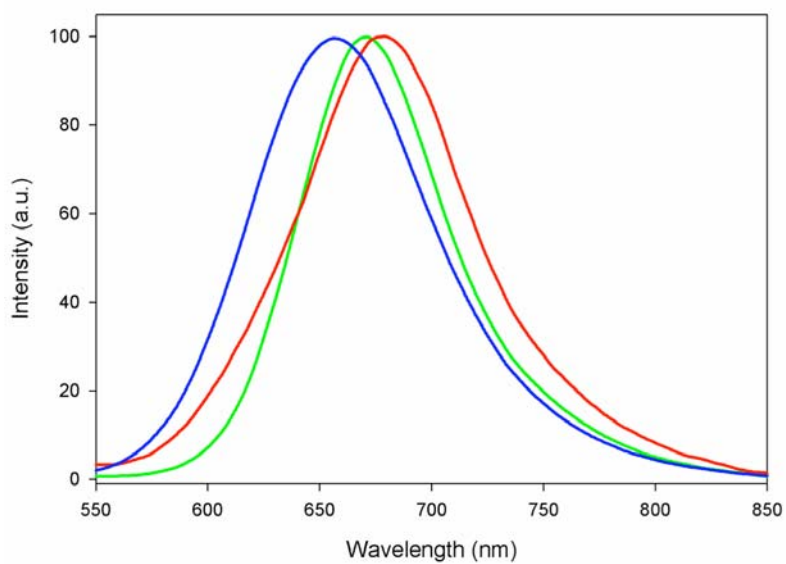

**Figure S2.** Steady state emission of compounds **8** (red), **9** (green), and **10** (blue) following excitation at 450 nm.
